# Supplementary material
Source: PubMed Central journal article supplement (PMC4081330)
Supplement: supp_pp.114.238816_238816SI_Figure_2.pdf [file supp_pp.114.238816_238816SI_Figure_2.pdf]

## SI Figure 2

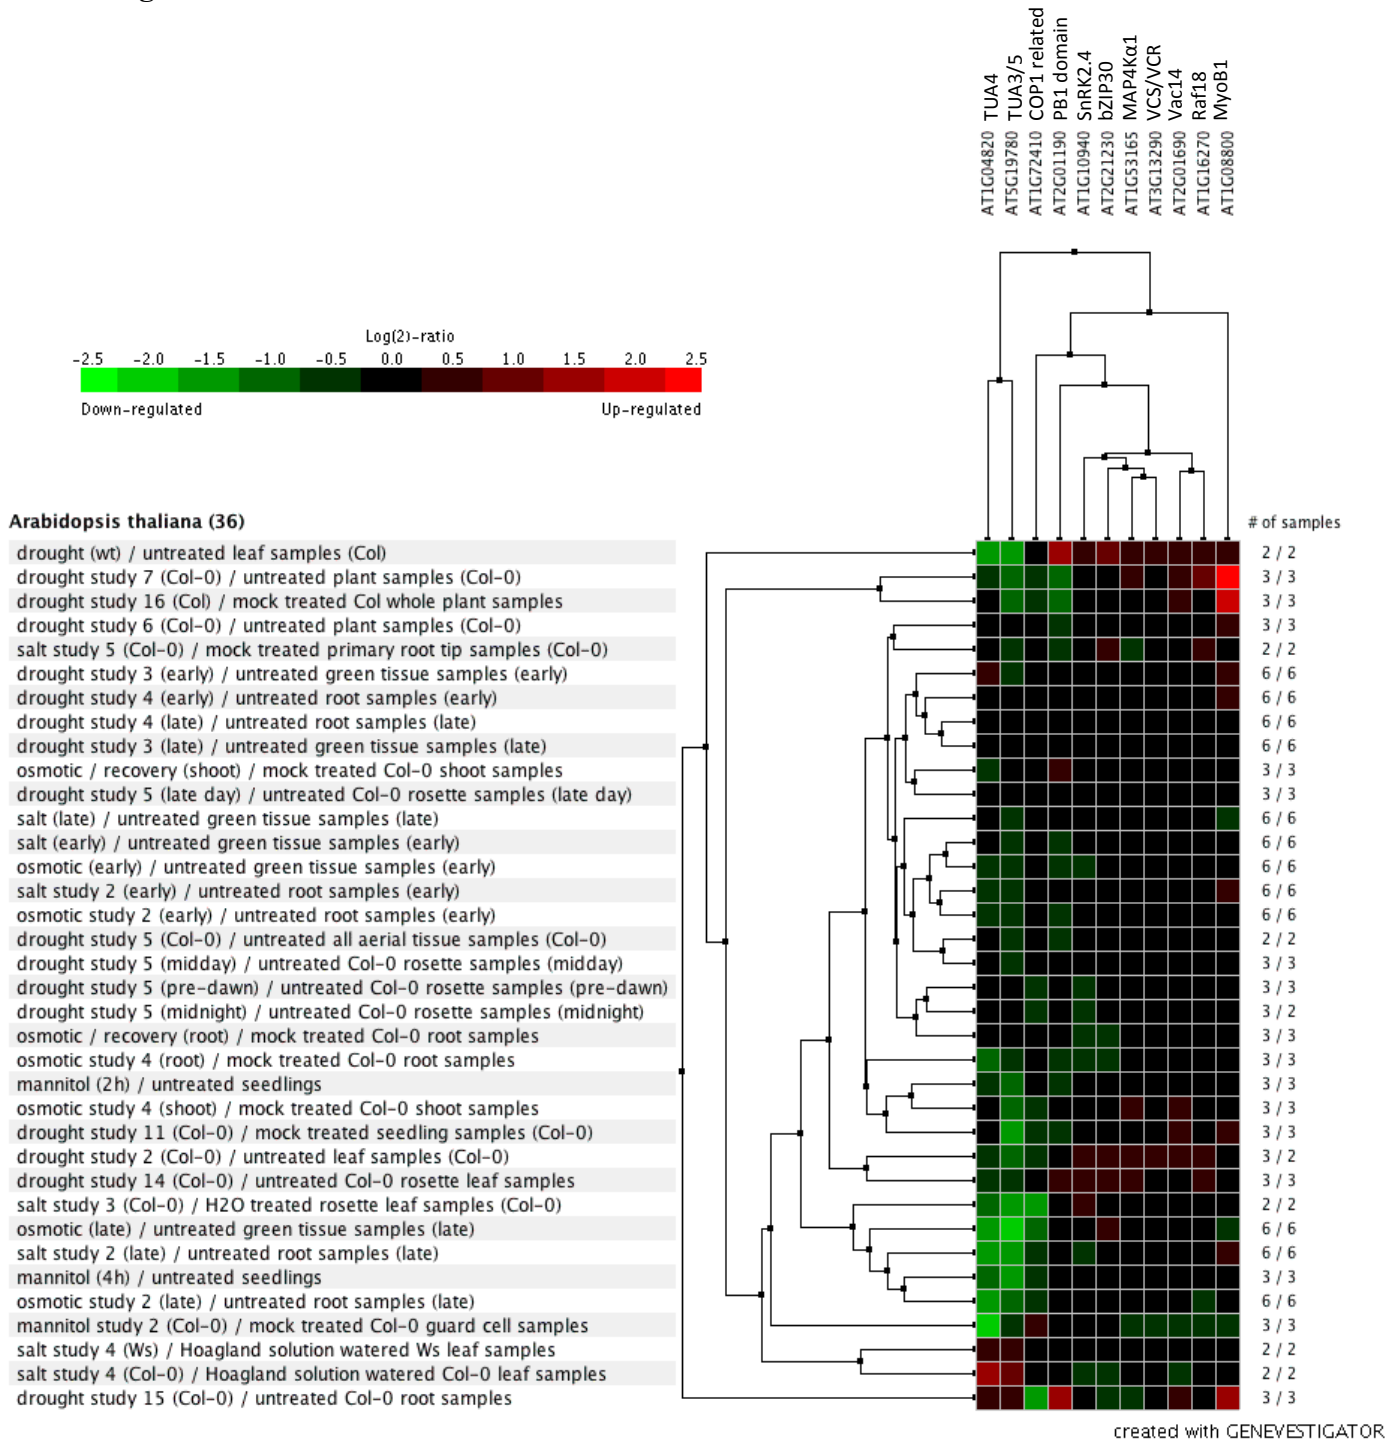

**SI Figure 2.** Extended gene expression analysis of osmotic-responsive phosphoproteins. Gene expression data was analyzed using Genevestigator. Experiments using wild-type plants and treatment conditions of salt, osmotic, or drought stress were selected. Microarray experimental IDs are found in SI Table 5.
